# Supplementary material
Source: Springer Nature journal article supplement (https://www.springermedizin.de/resource/supplementary/12885_2009_1972_MOESM5_ESM.pdf/9460216)
Supplement: MOESM5 [file 9460216]

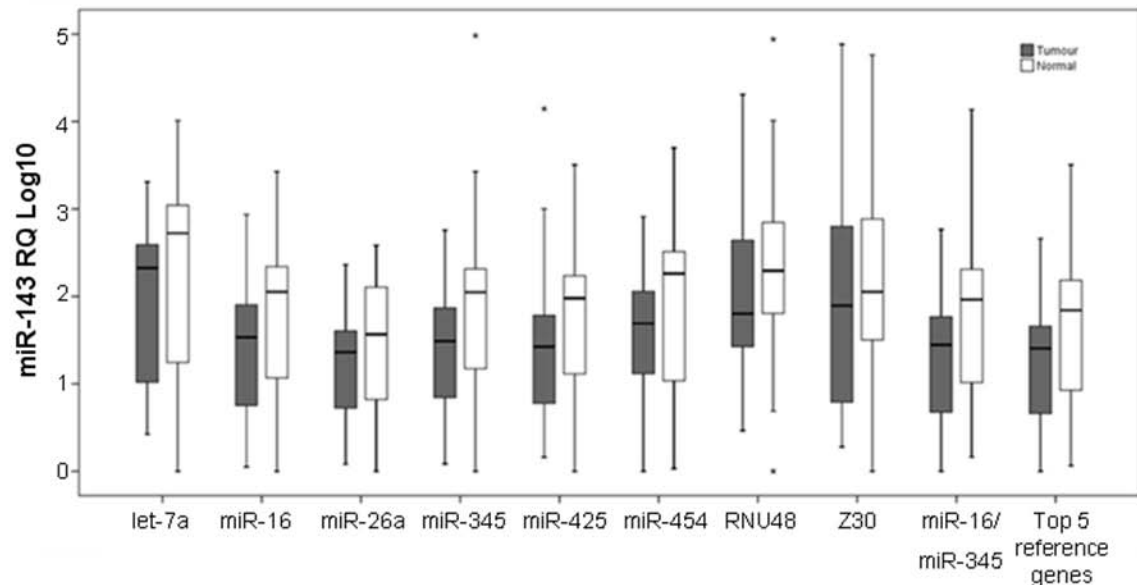

**Candidate reference genes and combinations**

|                |       |       |       |       |       |       |       |       |       |       |
|----------------|-------|-------|-------|-------|-------|-------|-------|-------|-------|-------|
| <i>p</i> value | 0.226 | 0.059 | 0.170 | 0.023 | 0.101 | 0.044 | 0.084 | 0.485 | 0.034 | 0.053 |
|----------------|-------|-------|-------|-------|-------|-------|-------|-------|-------|-------|

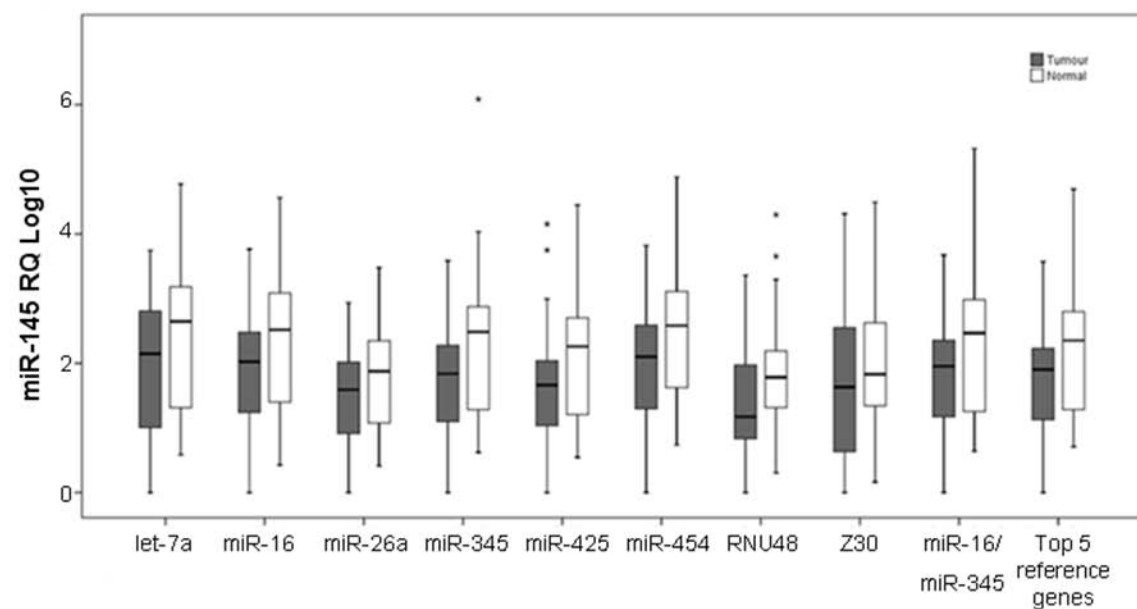

**Candidate reference genes and combinations**

|                |       |       |       |       |       |       |       |       |       |       |
|----------------|-------|-------|-------|-------|-------|-------|-------|-------|-------|-------|
| <i>p</i> value | 0.100 | 0.023 | 0.058 | 0.009 | 0.036 | 0.018 | 0.011 | 0.227 | 0.014 | 0.019 |
|----------------|-------|-------|-------|-------|-------|-------|-------|-------|-------|-------|
